# Supplementary material
Source: PubMed Central journal article supplement (PMC3318595)
Supplement: supp_32.8.1542_MCB5989-11_SF1.pdf [file supp_32.8.1542_MCB5989-11_SF1.pdf]

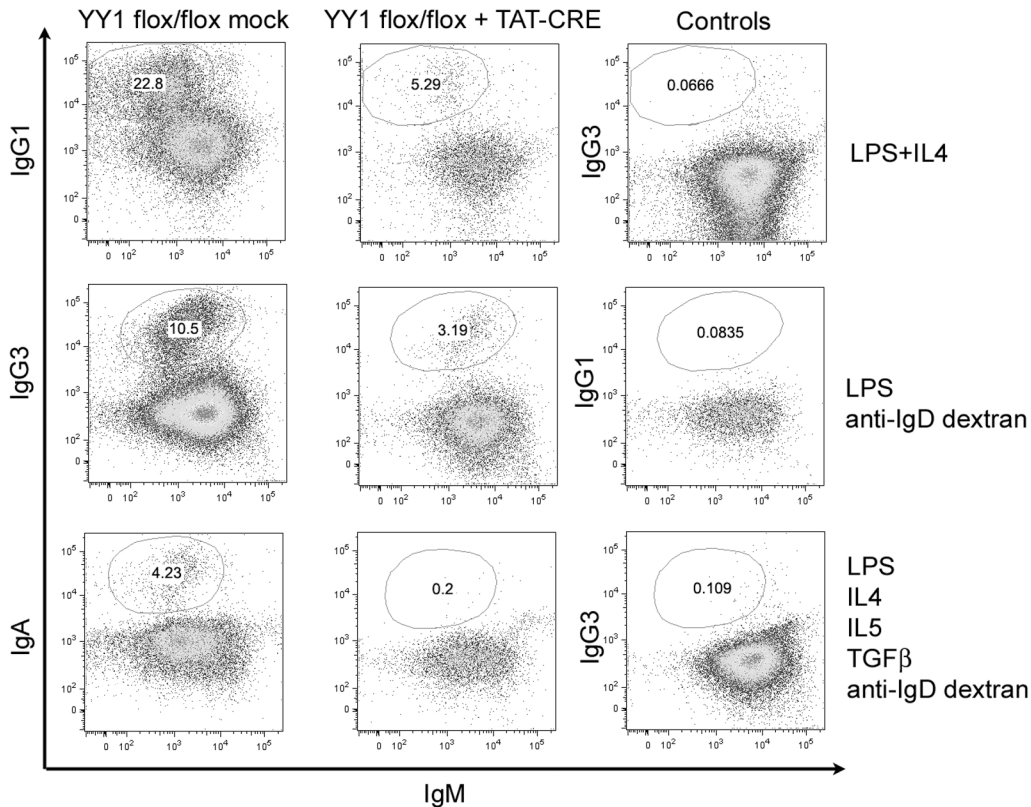

## Supplementary Figure 1

Supplementary FIG. S1. YY1 conditional knock-down results in reduced CSR to IgG1, IgG3, and IgA. Splenic B cells from YY1 flox/flox mice were treated with TAT-CRE protein and grown in either LPS plus IL4 (IgG1) LPS plus anti-IgD dextran (IgG3) or LPS, IL4, IL5, TGF $\beta$ , plus anti-IgD dextran (IgA), then evaluated by FACS for CSR to the appropriate isotype. YY1 deletion resulted in loss of CSR to all three isotypes.
