# Supplementary material
Source: PubMed Central journal article supplement (PMC3318595)
Supplement: supp_32.8.1542_MCB5989-11_SF2.pdf [file supp_32.8.1542_MCB5989-11_SF2.pdf]

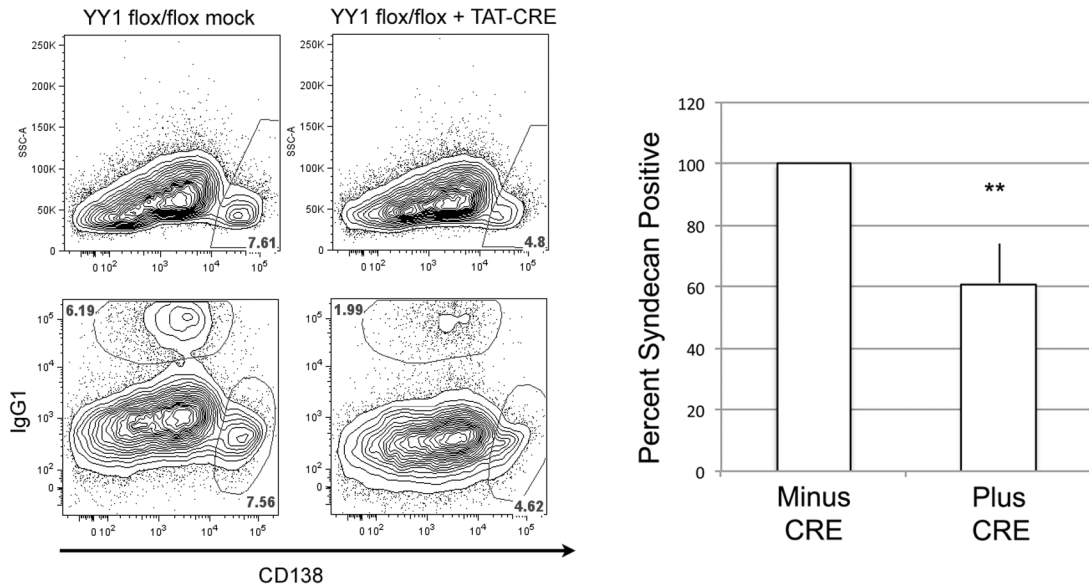

Supplementary Figure S2

Supplementary FIG. S2. YY1 conditional knock-down reduces the number of CD138 positive cells. Cells cultured in 5  $\mu\text{g/ml}$  LPS and 20  $\text{ng/ml}$  IL4 for 3 days were stained with anti-CD138-APC as well as anti-IgG1-PE. The panel at the right shows summary data from six independent experiments. Error bars show standard deviation of the mean and the double asterisks represents  $p < 0.001$ .
