# Supplementary material
Source: PubMed Central journal article supplement (PMC3318595)
Supplement: supp_32.8.1542_MCB5989-11_SF3.pdf [file supp_32.8.1542_MCB5989-11_SF3.pdf]

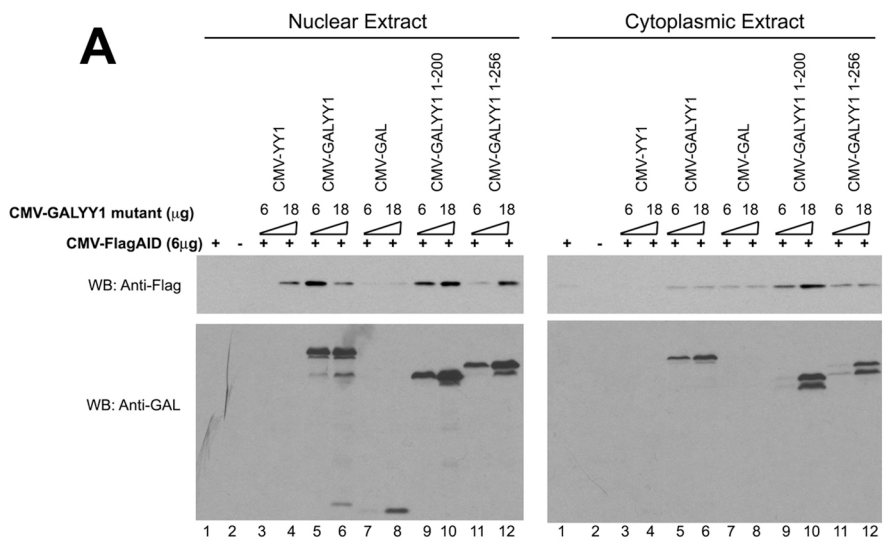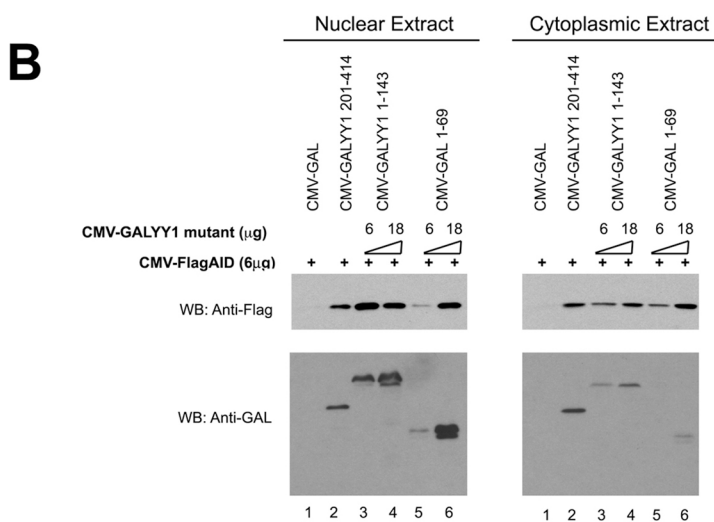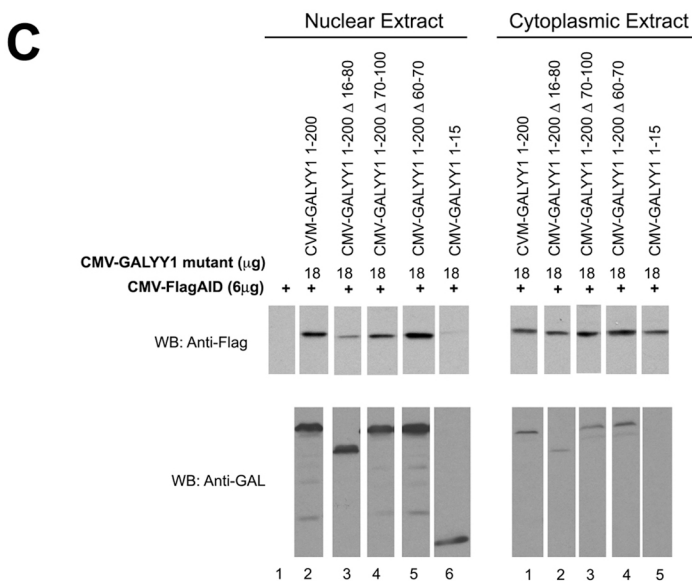

Supplementary Figure S3

Supplementary FIG. S3. (A-C) Western blot data for AID nuclear localization with various YY1 mutants. HEK293T cells were transfected with  $6\mu\text{g}$  of Flag-AID and  $18\mu\text{g}$  of various YY1 mutants shown above each lane. The top panels show the level of nuclear AID and the bottom panels show inputs for GAL-YY1 mutants.
