# Supplementary material
Source: PubMed Central journal article supplement (PMC3318595)
Supplement: supp_32.8.1542_MCB5989-11_SF4.pdf [file supp_32.8.1542_MCB5989-11_SF4.pdf]

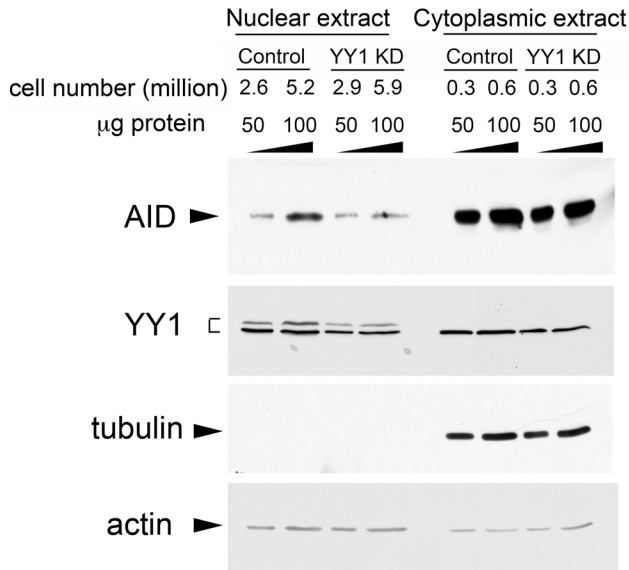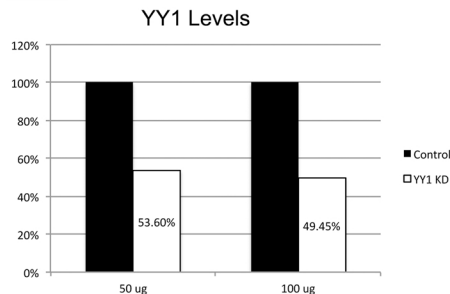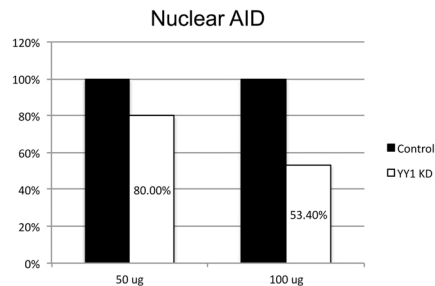

## Supplementary Figure S4

Supplementary FIG. S4. YY1 knock-down in CH12 B cells reduces the amount of nuclear AID. CH12 B cells were transfected with YY1 siRNA and nuclear and cytoplasmic fractions were prepared and were probed by western blot for AID, YY1, tubulin, and actin. The number of cell equivalents in each lane are shown at the top. In the YY1 blot the upper band in the nuclear extract represents the YY1-specific band and the lower band present in the nucleus and cytoplasm represents a non-specific band.
