# Supplementary material
Source: PubMed Central journal article supplement (PMC3318595)
Supplement: supp_32.8.1542_MCB5989-11_ST1.pdf [file supp_32.8.1542_MCB5989-11_ST1.pdf]

**Supplementary Table S1**

**Percent Surface IgG1 Expression in Multiple Experiments**

| <b>C57BL/6 WT vs YY1 f/f Plus CRE</b> | <b>YY1 f/f Minus vs Plus CRE</b> |
|---------------------------------------|----------------------------------|
| 54.2                                  | 38                               |
| 53.2                                  | 19.1                             |
| 50                                    | 16.7                             |
| 56.3                                  | 22                               |
| 50                                    | 33                               |
| 58.7                                  | 22.5                             |
| AVERAGE 53.7%                         | 27.8                             |
|                                       | 33.3                             |
|                                       | 37                               |
|                                       | 53.7                             |
|                                       | 30                               |
|                                       | 31.7                             |
|                                       | 45.8                             |
|                                       | 46.7                             |
|                                       | AVERAGE 32.6%                    |
